# Supplementary material for: Mapping the relationship between total and functional antibodies conjugated to nanoparticles with spectrally-resolved direct stochastic optical reconstruction microscopy (SR-dSTORM)
Source: Royal Society of Chemistry journal article supplement (doi:10.1039/d2na00435f), 2022-01-01
Supplement: d2na00435f1.pdf [file d2na00435f1.pdf]

## Supporting information

### Mapping the relationship between total and functional antibodies conjugated to nanoparticles with spectrally-resolved direct stochastic optical reconstruction microscopy (dSTORM)

Emmanouil Archontakis<sup>1†</sup>, Laura Woythe<sup>1†</sup>, Bas van Hoof<sup>2</sup>, Lorenzo Albertazzi<sup>1,3\*</sup>

<sup>1</sup> Department of Biomedical Engineering and Institute for Complex Molecular Systems (ICMS), Eindhoven University of Technology, P.O. Box 513, 5600 MB Eindhoven, The Netherlands

<sup>2</sup> Department of Applied Physics, Institute for Complex Molecular Systems, Eindhoven University of Technology, P.O. Box 513, 5600 MB, Eindhoven, The Netherlands

<sup>3</sup> Nanoscopy for Nanomedicine, Institute for Bioengineering of Catalonia, Barcelona, Spain

† These authors contributed equally

\*Correspondence: l.albertazzi@tue.nl

#### Supplementary Figures

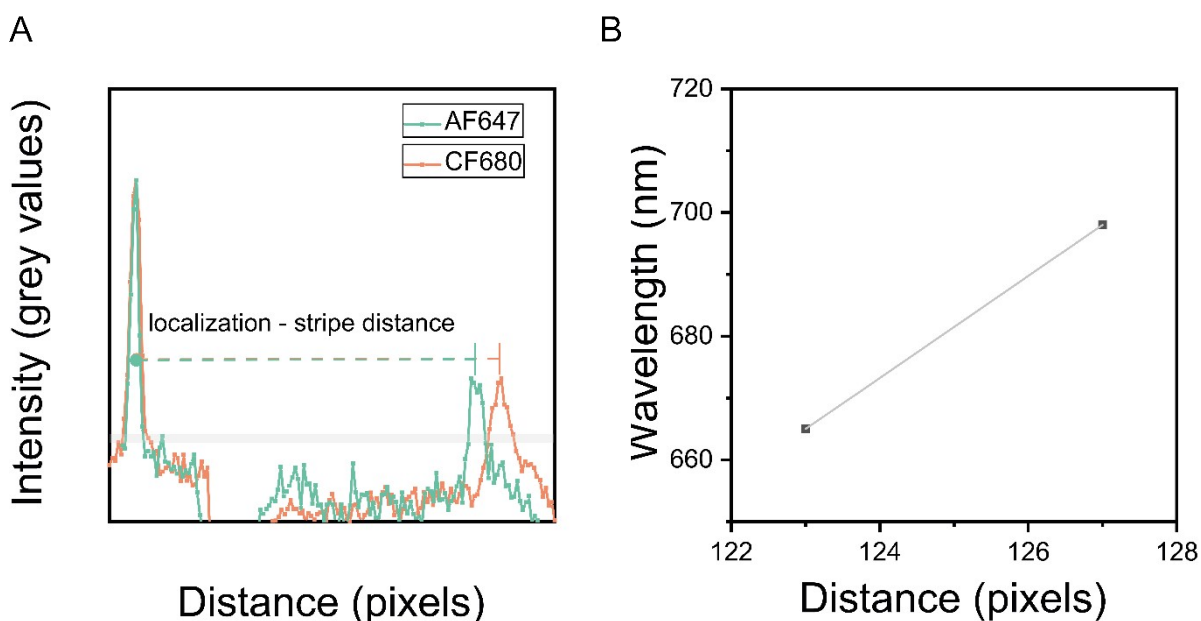

**Supplementary Figure S1.** A) Representative raw intensity profile of two single-localizations on a single nanoparticle (AF647 in green and CF680 in orange). Each fluorophore has a unique spectral peak which is reflected in pixel distance from localization in spatial region. B) The localization - stripe pixel distance can be calibrated to extract the pixel to wavelength ratio.

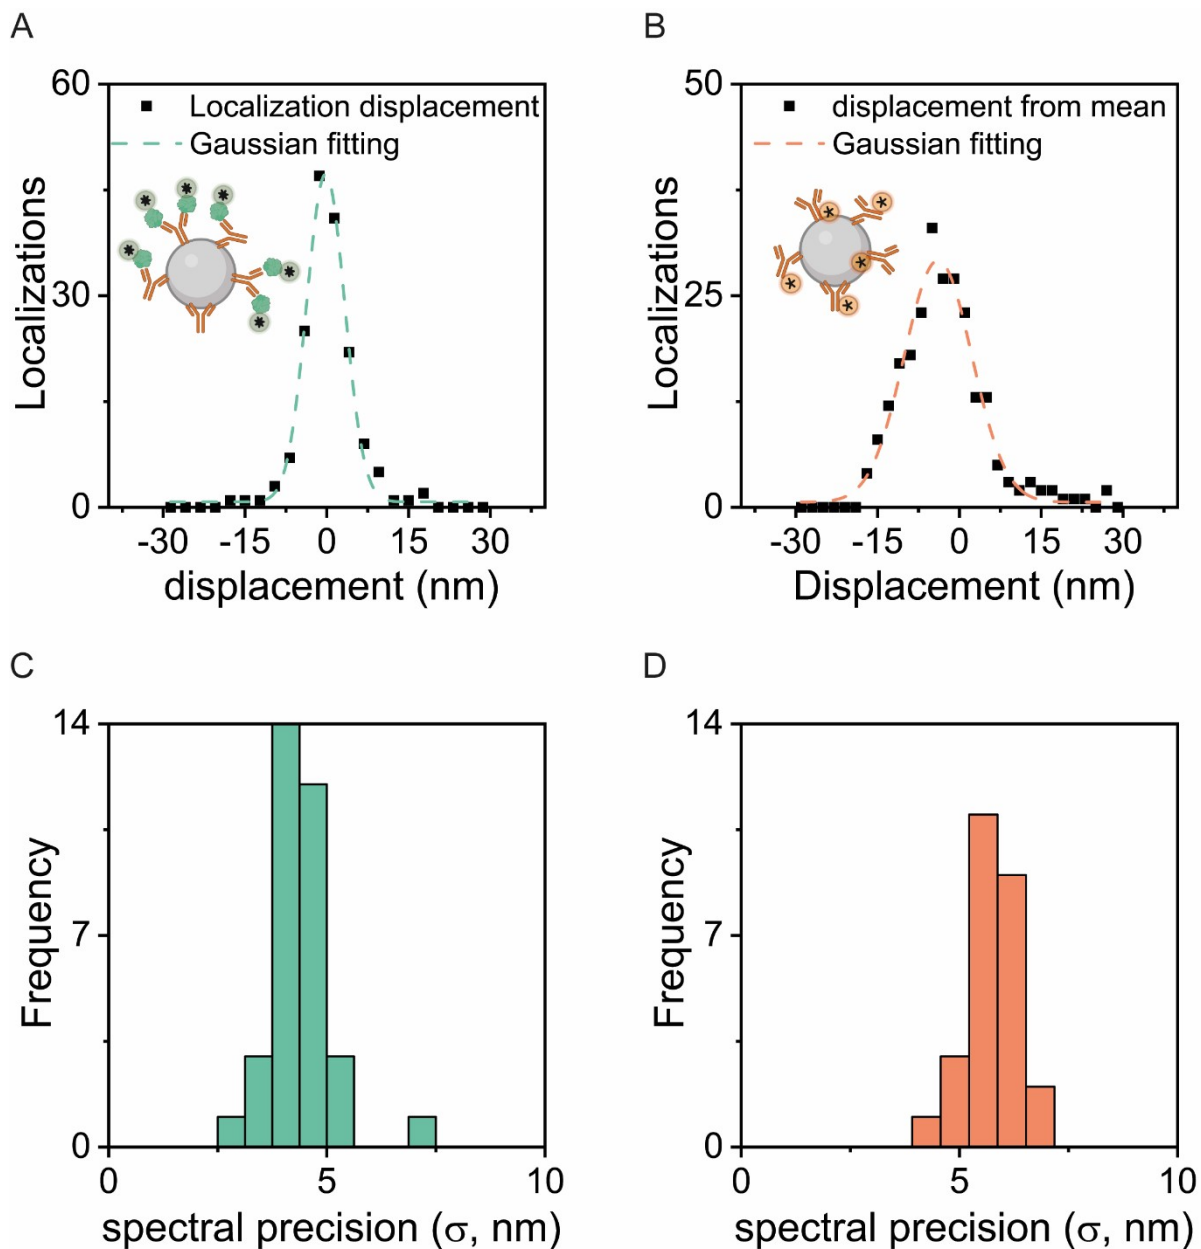

**Supplementary Figure S2.** A) Wavelength peak displacements from the mean value for a single EGFR-AF647-labelled nanoparticle. B) Wavelength peak displacements from the mean value for a single cetuximab-CF680-labelled nanoparticle. Each square corresponds to a single localization. The single-particle spectral precision ( $\sigma$ ) can be calculated by fitting a Gaussian profile. C) Histogram of spectral precisions from 40 EGFR-AF647-labelled nanoparticles. D) Histogram of spectral precisions from 40 cetuximab-CF680-labelled nanoparticles.

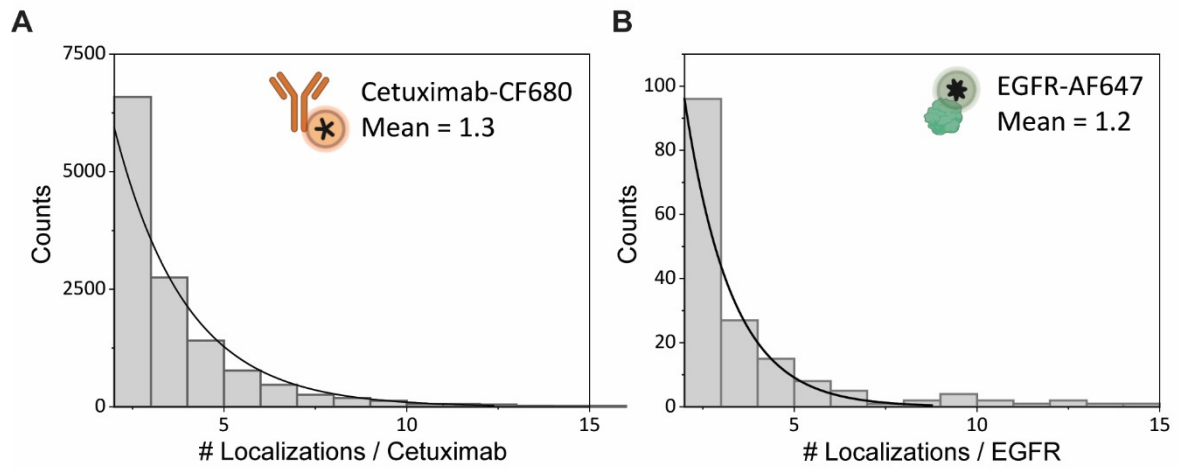

**Supplementary Figure S3.** Quantification of single-molecule localizations per A) cetuximab-CF680 and B) EGFR-AF647 molecules. The histogram of the number of localizations per cetuximab was fitted with an exponential decay function to obtain the mean.
